# Supplementary material for: Outcomes of a Multimedia Educational Workshop in an Internal Medicine Residency
Source: Research Square preprint supplement (doi:10.21203/rs.3.rs-6205858/v1), 2025-04-03
Supplement: Supplementary file 1 [file 7588e91bab18a494e00838a5.docx]

| Category | **1** | **2** | **3** | **4** | **5** |
| --- | --- | --- | --- | --- | --- |
| Content | The content was confusing or contained numerous factual errors, the presentation was not at all cohesive. | The content was generally accurate. One to two pieces of information were flawed, inaccurate, or out of date. The presentation was minimally cohesive. | Most of the content was accurate and most of the information is up to date. The presentation was moderately cohesive. | All the content was accurate and up to date. One to two sources were utilized to create a presentation that was quite cohesive. | All the content was accurate and up to date. Numerous sources have been utilized to create an exceptional presentation that was very cohesive. |
| Text | The slides included large amounts of text (i.e. usually sentences or paragraphs). The information was not at all condensed. | The slides included large amounts of texts (i.e. usually sentences or lengthy bullet points). The information was minimally condensed. | The slides included 10-20 words/slide, some sentences, or lengthy bullet points. The information was moderately condensed. | The slides include 10 or fewer words per slide with few sentences, the information was quite condensed. | The slides included 6-7 words per slide, information was very condensed. |
| Graphics (may include pictures, well formatted charts, etc) | The slides contained no graphics. | The slides contained some graphics but graphics were irrelevant or extraneous. | The slides contained some graphics which support the topic and are appropriate during the presentation. | The slides contained a reasonable quantity of graphics which tie into the topic and are quite valuable to the presentation. | The slides contained several effective graphics which tie in directly with the topic and add great value to the presentation. |
| Presentation | The resident entirely read from the slides. | The resident frequently read from the slides. | The resident occasionally read from the slides. | The resident minimally read from the slides. | The resident did not read from the slides. |
